# Supplementary material for: Potential DNA binding and nuclease functions of ComEC domains characterized in silico
Source: PubMed Central journal article supplement (PMC5031224; doi:10.1002/prot.25088), 2016-07-01
Supplement: PROT-84-1431-s001.pdf [file PROT-84-1431-s001.pdf]

## Supplementary Figures

**Fig 1. Raw HHpred server output for a) residues 1-191 containing the OB fold and b) residues 479-776, containing the  $\beta$ -lactamase-like nuclease domain, of *B. subtilis* ComEC.**

a)

| No Hit                   |    | Prob   | E-value                 | P-value | Score   | SS      | Cols | Query | HMM | Template | HMM           |
|--------------------------|----|--------|-------------------------|---------|---------|---------|------|-------|-----|----------|---------------|
| <input type="checkbox"/> | 1  | 3kdf_D | Replication protein A 3 | 79.5    | 14      | 0.00038 | 25.2 | 7.7   | 64  | 77-142   | 33-97 (132)   |
| <input type="checkbox"/> | 2  | 3au7_A | TIAS, putative uncharac | 77.8    | 11      | 0.0003  | 31.6 | 7.6   | 62  | 77-139   | 286-348 (402) |
| <input type="checkbox"/> | 3  | 3kf6_A | Protein STN1; OB fold,  | 71.0    | 29      | 0.0008  | 24.6 | 9.1   | 66  | 77-144   | 49-116 (159)  |
| <input type="checkbox"/> | 4  | 4gn4_B | Obody AM2EP06; beta bar | 68.5    | 26      | 0.00072 | 23.0 | 7.1   | 64  | 77-142   | 21-88 (108)   |
| <input type="checkbox"/> | 5  | 4gnx_B | Putative uncharacterize | 65.0    | 35      | 0.00096 | 23.2 | 7.5   | 65  | 77-142   | 38-102 (136)  |
| <input type="checkbox"/> | 6  | 2pi2_A | Replication protein A 3 | 60.9    | 47      | 0.0013  | 25.9 | 7.7   | 63  | 78-142   | 74-137 (270)  |
| <input type="checkbox"/> | 7  | 1c0a_A | Aspartyl tRNA synthetas | 58.8    | 58      | 0.0016  | 28.7 | 8.6   | 69  | 77-147   | 17-86 (585)   |
| <input type="checkbox"/> | 8  | 4wj4_A | Aspartate--tRNA(Asp/Asn | 55.2    | 53      | 0.0015  | 29.0 | 7.8   | 69  | 77-147   | 26-95 (599)   |
| <input type="checkbox"/> | 9  | 4joi_A | CST complex subunit STN | 52.9    | 65      | 0.0018  | 22.6 | 8.7   | 64  | 77-142   | 38-125 (166)  |
| <input type="checkbox"/> | 10 | 1sr3_A | APO-CCME; OB fold, beta | 52.9    | 66      | 0.0018  | 22.6 | 9.5   | 56  | 77-139   | 30-88 (136)   |
| <input type="checkbox"/> | 11 | 3m4p_A | Ehasnrs, asparaginy1-tR | 51.0    | 1.1E+02 | 0.003   | 25.9 | 8.8   | 72  | 77-149   | 32-109 (456)  |
| <input type="checkbox"/> | 12 | 3e0e_A | Replication protein A;  | 49.2    | 53      | 0.0015  | 20.5 | 5.5   | 56  | 77-139   | 13-78 (97)    |
| <input type="checkbox"/> | 13 | 3nem_A | Aspartyl-tRNA synthetas | 45.5    | 1.5E+02 | 0.0043  | 24.8 | 9.4   | 68  | 77-146   | 18-87 (438)   |
| <input type="checkbox"/> | 14 | 4rmf_A | Aspartate--tRNA(Asp/Asn | 44.7    | 1.4E+02 | 0.0038  | 26.5 | 8.7   | 67  | 77-147   | 18-85 (609)   |
| <input type="checkbox"/> | 15 | 1l0w_A | Aspartyl-tRNA synthetas | 41.6    | 1.2E+02 | 0.0035  | 26.5 | 7.9   | 67  | 77-147   | 18-84 (580)   |
| <input type="checkbox"/> | 16 | 1e1o_A | Lysyl-tRNA synthetase,  | 41.5    | 1.5E+02 | 0.0043  | 25.5 | 8.3   | 64  | 77-142   | 66-132 (504)  |
| <input type="checkbox"/> | 17 | 3kf8_A | Protein STN1; OB fold;  | 37.7    | 1.4E+02 | 0.0038  | 22.6 | 6.8   | 62  | 77-138   | 87-158 (220)  |
| <input type="checkbox"/> | 18 | 1j6q_A | Cytochrome C maturation | 37.5    | 1.2E+02 | 0.0034  | 21.2 | 8.2   | 56  | 77-139   | 34-93 (136)   |
| <input type="checkbox"/> | 19 | 4gnx_A | Putative uncharacterize | 37.0    | 1.1E+02 | 0.003   | 20.5 | 8.5   | 65  | 77-154   | 20-96 (114)   |
| <input type="checkbox"/> | 20 | 2xgt_A | Asparaginy1-tRNA synthe | 36.1    | 1.4E+02 | 0.0039  | 25.1 | 7.2   | 71  | 77-149   | 13-84 (435)   |
| <input type="checkbox"/> | 21 | 1eov_A | ASPRS, aspartyl-tRNA sy | 34.8    | 2.5E+02 | 0.0069  | 24.0 | 9.2   | 65  | 77-143   | 38-108 (487)  |
| <input type="checkbox"/> | 22 | 3ut1_A | Lethal(3)malignant brai | 33.5    | 37      | 0.001   | 27.5 | 3.1   | 23  | 137-159  | 209-231 (324) |
| <input type="checkbox"/> | 23 | 1gut_A | Mopii, molybdate bindin | 33.0    | 87      | 0.0024  | 18.2 | 6.6   | 52  | 78-134   | 7-58 (68)     |
| <input type="checkbox"/> | 24 | 2kct_A | Cytochrome C-type bioge | 30.6    | 1.3E+02 | 0.0036  | 19.6 | 9.4   | 54  | 77-137   | 10-69 (94)    |
| <input type="checkbox"/> | 25 | 1wyd_A | Hypothetical aspartyl-t | 29.7    | 2.8E+02 | 0.0078  | 23.2 | 8.0   | 64  | 77-143   | 18-81 (429)   |
| <input type="checkbox"/> | 26 | 3a74_A | Lysyl-tRNA synthetase;  | 29.3    | 1.9E+02 | 0.0053  | 24.8 | 7.0   | 64  | 77-142   | 58-123 (493)  |
| <input type="checkbox"/> | 27 | 2k50_A | Replication factor A re | 28.8    | 1.4E+02 | 0.0039  | 19.4 | 6.0   | 56  | 77-137   | 18-84 (115)   |
| <input type="checkbox"/> | 28 | 4ex5_A | Lysine--tRNA ligase; st | 27.2    | 1.8E+02 | 0.005   | 25.2 | 6.5   | 61  | 77-139   | 88-150 (529)  |
| <input type="checkbox"/> | 29 | 3i7f_A | Aspartyl-tRNA synthetas | 25.9    | 3.8E+02 | 0.01    | 23.3 | 8.9   | 67  | 77-145   | 64-133 (548)  |
| <input type="checkbox"/> | 30 | 1x54_A | Asparaginy1-tRNA synthe | 25.7    | 2.7E+02 | 0.0074  | 23.3 | 7.2   | 64  | 77-142   | 18-83 (434)   |
| <input type="checkbox"/> | 31 | 1fr3_A | MOP, molybdate/tungstat | 23.9    | 1.3E+02 | 0.0037  | 17.4 | 6.3   | 53  | 78-136   | 7-59 (67)     |
| <input type="checkbox"/> | 32 | 4j15_A | Aspartate--tRNA ligase, | 23.1    | 4.2E+02 | 0.012   | 22.9 | 9.0   | 68  | 77-147   | 79-149 (521)  |

b)

|                          |    |        |                         |       |         |         |       |      |     |        |               |
|--------------------------|----|--------|-------------------------|-------|---------|---------|-------|------|-----|--------|---------------|
| <input type="checkbox"/> | 1  | 2bib_A | CBPE, teichoic acid pho | 100.0 | 4.2E-33 | 1.2E-37 | 264.4 | 28.0 | 245 | 16-281 | 1-297 (547)   |
| <input type="checkbox"/> | 2  | 3bv6_A | Metal-dependent hydrola | 99.9  | 4.7E-25 | 1.3E-29 | 200.0 | 18.3 | 241 | 17-298 | 58-372 (379)  |
| <input type="checkbox"/> | 3  | 2gcu_A | Putative hydroxyacylglu | 99.9  | 1E-26   | 2.8E-31 | 198.6 | 6.6  | 216 | 19-272 | 1-244 (245)   |
| <input type="checkbox"/> | 4  | 2wyl_A | L-ascorbate-6-phosphate | 99.9  | 5.1E-25 | 1.4E-29 | 198.4 | 17.7 | 248 | 17-298 | 34-347 (360)  |
| <input type="checkbox"/> | 5  | 1xm8_A | Glyoxalase II; structur | 99.9  | 9.7E-25 | 2.7E-29 | 187.3 | 11.5 | 196 | 21-266 | 1-209 (254)   |
| <input type="checkbox"/> | 6  | 3adr_A | Putative uncharacterize | 99.9  | 2.1E-25 | 6E-30   | 191.8 | 6.1  | 214 | 19-268 | 2-258 (261)   |
| <input type="checkbox"/> | 7  | 1qh5_A | Glyoxalase II, protein  | 99.9  | 4.6E-23 | 1.3E-27 | 177.5 | 15.7 | 170 | 21-233 | 1-189 (260)   |
| <input type="checkbox"/> | 8  | 4ysb_A | Metallo-beta-lactamase  | 99.9  | 2.4E-24 | 6.7E-29 | 182.6 | 7.6  | 201 | 19-262 | 1-222 (233)   |
| <input type="checkbox"/> | 9  | 2qed_A | Hydroxyacylglutathione  | 99.9  | 4E-23   | 1.1E-27 | 177.7 | 13.3 | 196 | 19-259 | 6-237 (258)   |
| <input type="checkbox"/> | 10 | 4chl_A | Persulfide dioxygenase  | 99.9  | 3.7E-24 | 1E-28   | 182.0 | 5.6  | 210 | 13-262 | 1-230 (238)   |
| <input type="checkbox"/> | 11 | 2p18_A | Glyoxalase II; metallo  | 99.9  | 8.5E-22 | 2.4E-26 | 173.9 | 17.3 | 174 | 21-233 | 29-242 (311)  |
| <input type="checkbox"/> | 12 | 1zkp_A | Hypothetical protein BA | 99.9  | 3.2E-21 | 8.9E-26 | 166.5 | 19.7 | 216 | 17-273 | 21-266 (268)  |
| <input type="checkbox"/> | 13 | 3md7_A | Beta-lactamase-like; ss | 99.9  | 3.7E-22 | 1E-26   | 174.7 | 12.6 | 218 | 15-283 | 23-291 (293)  |
| <input type="checkbox"/> | 14 | 2xf4_A | Hydroxyacylglutathione  | 99.9  | 9.3E-22 | 2.6E-26 | 163.6 | 13.5 | 177 | 21-225 | 1-201 (210)   |
| <input type="checkbox"/> | 15 | 1k07_A | FEZ-1 beta-lactamase; m | 99.8  | 2.4E-20 | 6.6E-25 | 160.4 | 16.1 | 177 | 23-233 | 17-232 (263)  |
| <input type="checkbox"/> | 16 | 3g1p_A | Protein PHNP; C-P lyase | 99.8  | 3E-20   | 8.2E-25 | 159.7 | 16.4 | 208 | 19-283 | 1-251 (258)   |
| <input type="checkbox"/> | 17 | 3k17_A | Putative metal-dependen | 99.8  | 1.2E-19 | 3.4E-24 | 153.7 | 17.1 | 199 | 15-269 | 24-235 (235)  |
| <input type="checkbox"/> | 18 | 1sml_A | Protein (penicillinase) | 99.8  | 1.8E-19 | 4.9E-24 | 155.4 | 18.3 | 165 | 23-220 | 30-230 (269)  |
| <input type="checkbox"/> | 19 | 4jo0_A | CMLA; nonheme oxygenase | 99.8  | 2.6E-20 | 7.3E-25 | 174.9 | 13.3 | 232 | 18-274 | 250-534 (534) |
| <input type="checkbox"/> | 20 | 2cbn_A | Ribonuclease Z; phospho | 99.8  | 1.6E-19 | 4.4E-24 | 158.7 | 17.5 | 212 | 21-273 | 2-304 (306)   |
| <input type="checkbox"/> | 21 | 1y44_A | Ribonuclease Z; zinc-de | 99.8  | 2.8E-19 | 7.8E-24 | 158.3 | 18.0 | 213 | 21-273 | 1-302 (320)   |
| <input type="checkbox"/> | 22 | 4ax1_B | Metallo-beta-lactamase  | 99.8  | 1.7E-19 | 4.7E-24 | 158.2 | 16.4 | 210 | 2-258  | 6-279 (303)   |
| <input type="checkbox"/> | 23 | 2vw8_A | PA1000, PQSE; quinolone | 99.8  | 6.8E-22 | 1.9E-26 | 173.6 | 1.0  | 229 | 10-263 | 1-278 (303)   |
| <input type="checkbox"/> | 24 | 2zwr_A | Metallo-beta-lactamase  | 99.8  | 8.4E-20 | 2.3E-24 | 151.5 | 13.4 | 170 | 21-225 | 1-193 (207)   |
| <input type="checkbox"/> | 25 | 3m8t_A | 'BLR6230 protein; subcl | 99.8  | 2.9E-19 | 8.1E-24 | 156.2 | 15.8 | 171 | 23-227 | 47-253 (294)  |
| <input type="checkbox"/> | 26 | 3vpe_A | Metallo-beta-lactamase; | 99.8  | 8.7E-19 | 2.4E-23 | 150.5 | 16.0 | 194 | 23-258 | 18-251 (262)  |
| <input type="checkbox"/> | 27 | 5aeb_A | LRA-12; hydrolase, carb | 99.8  | 3.2E-19 | 8.8E-24 | 154.2 | 13.3 | 169 | 23-225 | 30-236 (272)  |
| <input type="checkbox"/> | 28 | 3tp9_A | Beta-lactamase and rhod | 99.8  | 1.9E-19 | 5.4E-24 | 167.8 | 12.0 | 182 | 18-232 | 1-225 (474)   |
| <input type="checkbox"/> | 29 | 2i7t_A | Cleavage and polyadenyl | 99.8  | 1.8E-18 | 5.1E-23 | 160.6 | 16.4 | 216 | 18-265 | 9-270 (459)   |
| <input type="checkbox"/> | 30 | 4efz_A | Metallo-beta-lactamase  | 99.8  | 1.6E-18 | 4.5E-23 | 152.0 | 14.4 | 175 | 18-218 | 2-218 (298)   |
| <input type="checkbox"/> | 31 | 2e7y_A | TRNAse Z; tRNA maturati | 99.8  | 2.9E-18 | 7.9E-23 | 148.9 | 15.5 | 211 | 21-273 | 1-278 (280)   |
| <input type="checkbox"/> | 32 | 3zq4_A | Ribonuclease J 1, RNase | 99.8  | 2.1E-17 | 5.9E-22 | 156.7 | 20.7 | 212 | 16-267 | 4-256 (555)   |
| <input type="checkbox"/> | 33 | 4ysl_A | Beta-lactamase domain p | 99.8  | 4.1E-18 | 1.1E-22 | 149.2 | 14.7 | 170 | 24-219 | 11-215 (294)  |
| <input type="checkbox"/> | 34 | 2ohh_A | Type A flavoprotein FPR | 99.8  | 2.2E-18 | 6E-23   | 157.1 | 13.0 | 207 | 30-263 | 34-288 (404)  |
| <input type="checkbox"/> | 35 | 1e5d_A | Rubredoxin\oxygen oxid  | 99.8  | 1.1E-18 | 3.1E-23 | 159.1 | 10.4 | 201 | 31-263 | 35-284 (402)  |
| <input type="checkbox"/> | 36 | 2zo4_A | Metallo-beta-lactamase  | 99.8  | 3E-17   | 8.3E-22 | 145.0 | 19.0 | 182 | 23-230 | 8-247 (317)   |
| <input type="checkbox"/> | 37 | 3r2u_A | Metallo-beta-lactamase  | 99.8  | 2.8E-18 | 7.8E-23 | 159.6 | 12.9 | 180 | 14-232 | 20-245 (466)  |
| <input type="checkbox"/> | 38 | 3jxp_A | Coenzyme PQQ synthesis  | 99.8  | 4.4E-18 | 1.2E-22 | 150.7 | 13.3 | 220 | 21-273 | 3-303 (321)   |
| <input type="checkbox"/> | 39 | 3iek_A | Ribonuclease TTHA0252;  | 99.8  | 5.1E-18 | 1.4E-22 | 156.4 | 13.9 | 214 | 21-265 | 1-249 (431)   |
| <input type="checkbox"/> | 40 | 3bk2_A | RNase J, metal dependen | 99.8  | 3.7E-17 | 1E-21   | 155.2 | 20.1 | 211 | 15-267 | 11-272 (562)  |
| <input type="checkbox"/> | 41 | 1ycg_A | Nitric oxide reductase; | 99.8  | 3.5E-18 | 9.6E-23 | 155.6 | 12.5 | 202 | 31-263 | 36-283 (398)  |
| <input type="checkbox"/> | 42 | 4ojv_A | 3',5'-cyclic-nucleotide | 99.8  | 5E-18   | 1.4E-22 | 153.0 | 12.1 | 217 | 21-273 | 4-367 (369)   |
| <input type="checkbox"/> | 43 | 4ad9_A | Lactb2, beta-lactamase- | 99.7  | 2E-17   | 5.4E-22 | 144.4 | 13.4 | 171 | 28-229 | 29-213 (289)  |
| <input type="checkbox"/> | 44 | 4qn9_A | N-acyl-phosphatidyletha | 99.7  | 2.6E-16 | 7.2E-21 | 143.0 | 18.8 | 230 | 18-273 | 122-384 (393) |
| <input type="checkbox"/> | 45 | 4c1d_A | Beta-lactamase class B  | 99.7  | 9.9E-17 | 2.7E-21 | 136.2 | 14.0 | 167 | 31-236 | 45-241 (242)  |
| <input type="checkbox"/> | 46 | 5a0t_A | Ribonuclease J; hydrola | 99.7  | 8.3E-16 | 2.3E-20 | 146.0 | 21.8 | 209 | 18-267 | 16-266 (561)  |
| <input type="checkbox"/> | 47 | 2az4_A | Hypothetical protein EF | 99.7  | 1.8E-16 | 5E-21   | 146.0 | 16.7 | 210 | 16-266 | 2-282 (429)   |
| <input type="checkbox"/> | 48 | 4eyb_A | Beta-lactamase NDM-1; m | 99.7  | 2.6E-17 | 7.3E-22 | 142.0 | 10.0 | 181 | 2-219  | 15-253 (270)  |
| <input type="checkbox"/> | 49 | 2i7x_A | Protein CFT2; polyadeny | 99.7  | 4E-17   | 1.1E-21 | 158.6 | 11.8 | 215 | 21-277 | 1-249 (717)   |
| <input type="checkbox"/> | 50 | 1vjn_A | Zn-dependent hydrolase  | 99.7  | 6.2E-17 | 1.7E-21 | 135.7 | 11.3 | 173 | 18-258 | 10-195 (220)  |

**Fig 2. Raw DALI scores for a) the chosen final model, encompassing residues 72-167 of *B. subtilis* ComEC (see Fig 3B) and b) the top cluster centroid model for residues 72-172. Each is the top cluster centroid resulting from contact-assisted (PconsC2/bbcontacts predictions) *ab initio* Rosetta modelling.**

a)

| No:                      | Chain | Z                      | rmsd | lali | nres | %id | PDB                    | Description                                                  |
|--------------------------|-------|------------------------|------|------|------|-----|------------------------|--------------------------------------------------------------|
| <input type="checkbox"/> | 1:    | <a href="#">4apv-A</a> | 8.2  | 2.4  | 76   | 97  | 8 <a href="#">PDB</a>  | MOLECULE: PRIMOSOMAL REPLICATION PROTEIN N;                  |
| <input type="checkbox"/> | 2:    | <a href="#">1woc-B</a> | 8.1  | 2.5  | 79   | 99  | 6 <a href="#">PDB</a>  | MOLECULE: PRIMOSOMAL REPLICATION PROTEIN N;                  |
| <input type="checkbox"/> | 3:    | <a href="#">1woc-D</a> | 7.9  | 2.4  | 78   | 99  | 6 <a href="#">PDB</a>  | MOLECULE: PRIMOSOMAL REPLICATION PROTEIN N;                  |
| <input type="checkbox"/> | 4:    | <a href="#">3afq-A</a> | 7.8  | 2.5  | 77   | 105 | 12 <a href="#">PDB</a> | MOLECULE: SINGLE-STRANDED DNA-BINDING PROTEIN;               |
| <input type="checkbox"/> | 5:    | <a href="#">1z9f-A</a> | 7.8  | 2.1  | 75   | 89  | 7 <a href="#">PDB</a>  | MOLECULE: SINGLE-STRAND BINDING PROTEIN;                     |
| <input type="checkbox"/> | 6:    | <a href="#">1woc-A</a> | 7.8  | 2.6  | 79   | 99  | 6 <a href="#">PDB</a>  | MOLECULE: PRIMOSOMAL REPLICATION PROTEIN N;                  |
| <input type="checkbox"/> | 7:    | <a href="#">1x3f-B</a> | 7.8  | 2.5  | 78   | 115 | 10 <a href="#">PDB</a> | MOLECULE: SINGLE-STRAND BINDING PROTEIN;                     |
| <input type="checkbox"/> | 8:    | <a href="#">3f2c-A</a> | 7.7  | 2.2  | 75   | 993 | 7 <a href="#">PDB</a>  | MOLECULE: GEOBACILLUS KAUSTOPHILUS DNA POLC;                 |
| <input type="checkbox"/> | 9:    | <a href="#">1x3e-B</a> | 7.7  | 2.6  | 79   | 119 | 11 <a href="#">PDB</a> | MOLECULE: SINGLE-STRAND BINDING PROTEIN;                     |
| <input type="checkbox"/> | 10:   | <a href="#">2pnh-B</a> | 7.7  | 2.3  | 73   | 94  | 7 <a href="#">PDB</a>  | MOLECULE: PRIMOSOMAL REPLICATION PROTEIN N;                  |
| <input type="checkbox"/> | 11:   | <a href="#">4ycw-B</a> | 7.7  | 2.6  | 75   | 502 | 8 <a href="#">PDB</a>  | MOLECULE: LYSINE--TRNA LIGASE;                               |
| <input type="checkbox"/> | 12:   | <a href="#">4ycw-A</a> | 7.7  | 2.8  | 76   | 502 | 8 <a href="#">PDB</a>  | MOLECULE: LYSINE--TRNA LIGASE;                               |
| <input type="checkbox"/> | 13:   | <a href="#">3f2b-A</a> | 7.6  | 2.2  | 75   | 994 | 7 <a href="#">PDB</a>  | MOLECULE: DNA-DIRECTED DNA POLYMERASE III ALPHA CHAIN;       |
| <input type="checkbox"/> | 14:   | <a href="#">1ue7-C</a> | 7.6  | 2.4  | 76   | 98  | 11 <a href="#">PDB</a> | MOLECULE: SINGLE-STRAND BINDING PROTEIN;                     |
| <input type="checkbox"/> | 15:   | <a href="#">3afq-C</a> | 7.6  | 2.2  | 75   | 105 | 11 <a href="#">PDB</a> | MOLECULE: SINGLE-STRANDED DNA-BINDING PROTEIN;               |
| <input type="checkbox"/> | 16:   | <a href="#">3f2d-A</a> | 7.6  | 2.2  | 75   | 993 | 7 <a href="#">PDB</a>  | MOLECULE: 5'-D>(*DCP*DAP*DGP*DTP*DGP*DAP*DGP*DAP*DCP*DGP*DGP |
| <input type="checkbox"/> | 17:   | <a href="#">1woc-C</a> | 7.6  | 2.7  | 79   | 100 | 6 <a href="#">PDB</a>  | MOLECULE: PRIMOSOMAL REPLICATION PROTEIN N;                  |
| <input type="checkbox"/> | 18:   | <a href="#">2pnh-A</a> | 7.6  | 2.3  | 75   | 96  | 7 <a href="#">PDB</a>  | MOLECULE: PRIMOSOMAL REPLICATION PROTEIN N;                  |
| <input type="checkbox"/> | 19:   | <a href="#">2dud-B</a> | 7.6  | 2.5  | 78   | 92  | 8 <a href="#">PDB</a>  | MOLECULE: SINGLE-STRANDED DNA-BINDING PROTEIN;               |
| <input type="checkbox"/> | 20:   | <a href="#">2ccz-B</a> | 7.6  | 2.7  | 79   | 118 | 8 <a href="#">PDB</a>  | MOLECULE: 5'-D(*TP*TP*TP*TP*TP*TP*TP*TP*TP*TP                |
| <input type="checkbox"/> | 21:   | <a href="#">1txy-B</a> | 7.6  | 2.1  | 70   | 84  | 7 <a href="#">PDB</a>  | MOLECULE: PRIMOSOMAL REPLICATION PROTEIN N;                  |
| <input type="checkbox"/> | 22:   | <a href="#">3afq-B</a> | 7.5  | 2.6  | 77   | 113 | 10 <a href="#">PDB</a> | MOLECULE: SINGLE-STRANDED DNA-BINDING PROTEIN;               |
| <input type="checkbox"/> | 23:   | <a href="#">3eiv-A</a> | 7.5  | 2.2  | 74   | 98  | 12 <a href="#">PDB</a> | MOLECULE: SINGLE-STRANDED DNA-BINDING PROTEIN 2;             |
| <input type="checkbox"/> | 24:   | <a href="#">3afq-D</a> | 7.5  | 2.3  | 75   | 107 | 12 <a href="#">PDB</a> | MOLECULE: SINGLE-STRANDED DNA-BINDING PROTEIN;               |
| <input type="checkbox"/> | 25:   | <a href="#">3koj-A</a> | 7.5  | 2.2  | 73   | 89  | 11 <a href="#">PDB</a> | MOLECULE: UNCHARACTERIZED PROTEIN YCF41;                     |
| <input type="checkbox"/> | 26:   | <a href="#">4dam-D</a> | 7.4  | 2.9  | 80   | 109 | 10 <a href="#">PDB</a> | MOLECULE: SINGLE-STRANDED DNA-BINDING PROTEIN 1;             |
| <input type="checkbox"/> | 27:   | <a href="#">4dam-J</a> | 7.4  | 3.0  | 81   | 108 | 10 <a href="#">PDB</a> | MOLECULE: SINGLE-STRANDED DNA-BINDING PROTEIN 1;             |
| <input type="checkbox"/> | 28:   | <a href="#">1ue6-C</a> | 7.4  | 2.5  | 79   | 106 | 10 <a href="#">PDB</a> | MOLECULE: SINGLE-STRAND BINDING PROTEIN;                     |
| <input type="checkbox"/> | 29:   | <a href="#">1ue6-D</a> | 7.4  | 2.5  | 79   | 104 | 10 <a href="#">PDB</a> | MOLECULE: SINGLE-STRAND BINDING PROTEIN;                     |
| <input type="checkbox"/> | 30:   | <a href="#">2dud-A</a> | 7.4  | 2.5  | 78   | 95  | 8 <a href="#">PDB</a>  | MOLECULE: SINGLE-STRANDED DNA-BINDING PROTEIN;               |
| <input type="checkbox"/> | 31:   | <a href="#">1v1q-B</a> | 7.4  | 2.6  | 79   | 112 | 8 <a href="#">PDB</a>  | MOLECULE: PRIMOSOMAL REPLICATION PROTEIN N;                  |
| <input type="checkbox"/> | 32:   | <a href="#">2vw9-A</a> | 7.3  | 2.3  | 78   | 108 | 10 <a href="#">PDB</a> | MOLECULE: SINGLE-STRANDED DNA BINDING PROTEIN;               |
| <input type="checkbox"/> | 33:   | <a href="#">2vw9-B</a> | 7.3  | 2.3  | 76   | 105 | 11 <a href="#">PDB</a> | MOLECULE: SINGLE-STRANDED DNA BINDING PROTEIN;               |
| <input type="checkbox"/> | 34:   | <a href="#">3vdy-B</a> | 7.3  | 2.2  | 72   | 97  | 7 <a href="#">PDB</a>  | MOLECULE: SINGLE-STRANDED DNA-BINDING PROTEIN SSBB;          |
| <input type="checkbox"/> | 35:   | <a href="#">1ue1-B</a> | 7.3  | 2.7  | 79   | 119 | 10 <a href="#">PDB</a> | MOLECULE: SINGLE-STRAND BINDING PROTEIN;                     |
| <input type="checkbox"/> | 36:   | <a href="#">3vdy-A</a> | 7.3  | 2.5  | 77   | 101 | 6 <a href="#">PDB</a>  | MOLECULE: SINGLE-STRANDED DNA-BINDING PROTEIN SSBB;          |
| <input type="checkbox"/> | 37:   | <a href="#">4dam-E</a> | 7.2  | 2.9  | 80   | 112 | 10 <a href="#">PDB</a> | MOLECULE: SINGLE-STRANDED DNA-BINDING PROTEIN 1;             |
| <input type="checkbox"/> | 38:   | <a href="#">3k80-D</a> | 7.2  | 2.1  | 75   | 101 | 8 <a href="#">PDB</a>  | MOLECULE: ANTIBODY;                                          |
| <input type="checkbox"/> | 39:   | <a href="#">3eiv-D</a> | 7.2  | 2.2  | 73   | 100 | 11 <a href="#">PDB</a> | MOLECULE: SINGLE-STRANDED DNA-BINDING PROTEIN 2;             |
| <input type="checkbox"/> | 40:   | <a href="#">4dam-H</a> | 7.2  | 2.6  | 78   | 108 | 9 <a href="#">PDB</a>  | MOLECULE: SINGLE-STRANDED DNA-BINDING PROTEIN 1;             |
| <input type="checkbox"/> | 41:   | <a href="#">2ccz-A</a> | 7.2  | 2.5  | 77   | 121 | 8 <a href="#">PDB</a>  | MOLECULE: 5'-D(*TP*TP*TP*TP*TP*TP*TP*TP*TP*TP                |
| <input type="checkbox"/> | 42:   | <a href="#">1x3g-B</a> | 7.2  | 2.6  | 78   | 115 | 12 <a href="#">PDB</a> | MOLECULE: SINGLE-STRAND BINDING PROTEIN;                     |
| <input type="checkbox"/> | 43:   | <a href="#">1s3o-B</a> | 7.2  | 2.4  | 78   | 104 | 6 <a href="#">PDB</a>  | MOLECULE: SINGLE-STRANDED DNA-BINDING PROTEIN,               |
| <input type="checkbox"/> | 44:   | <a href="#">1ue5-B</a> | 7.2  | 2.4  | 75   | 109 | 9 <a href="#">PDB</a>  | MOLECULE: SINGLE-STRAND BINDING PROTEIN;                     |
| <input type="checkbox"/> | 45:   | <a href="#">1txy-A</a> | 7.2  | 2.0  | 71   | 92  | 7 <a href="#">PDB</a>  | MOLECULE: PRIMOSOMAL REPLICATION PROTEIN N;                  |
| <input type="checkbox"/> | 46:   | <a href="#">3a5u-B</a> | 7.1  | 2.5  | 79   | 112 | 11 <a href="#">PDB</a> | MOLECULE: SINGLE-STRANDED DNA-BINDING PROTEIN;               |
| <input type="checkbox"/> | 47:   | <a href="#">3tqy-D</a> | 7.1  | 2.5  | 77   | 98  | 10 <a href="#">PDB</a> | MOLECULE: SINGLE-STRANDED DNA-BINDING PROTEIN;               |
| <input type="checkbox"/> | 48:   | <a href="#">1ue7-D</a> | 7.1  | 2.2  | 73   | 95  | 10 <a href="#">PDB</a> | MOLECULE: SINGLE-STRAND BINDING PROTEIN;                     |
| <input type="checkbox"/> | 49:   | <a href="#">3klw-B</a> | 7.1  | 2.4  | 74   | 90  | 9 <a href="#">PDB</a>  | MOLECULE: PRIMOSOMAL REPLICATION PROTEIN N;                  |
| <input type="checkbox"/> | 50:   | <a href="#">3koj-B</a> | 7.1  | 1.8  | 69   | 90  | 12 <a href="#">PDB</a> | MOLECULE: UNCHARACTERIZED PROTEIN YCF41;                     |

b)

| No:                      | Chain | Z                      | rmsd | lali | nres | %id | PDB                    | Description                                          |
|--------------------------|-------|------------------------|------|------|------|-----|------------------------|------------------------------------------------------|
| <input type="checkbox"/> | 1:    | <a href="#">3dm4-B</a> | 4.7  | 2.8  | 69   | 90  | 7 <a href="#">PDB</a>  | MOLECULE: PRIMOSOMAL REPLICATION PROTEIN N;          |
| <input type="checkbox"/> | 2:    | <a href="#">3klw-B</a> | 4.7  | 2.8  | 69   | 90  | 7 <a href="#">PDB</a>  | MOLECULE: PRIMOSOMAL REPLICATION PROTEIN N;          |
| <input type="checkbox"/> | 3:    | <a href="#">2hq1-B</a> | 4.5  | 2.4  | 70   | 101 | 9 <a href="#">PDB</a>  | MOLECULE: HYPOTHETICAL PROTEIN MG376 HOMOLOG;        |
| <input type="checkbox"/> | 4:    | <a href="#">2hq1-E</a> | 4.4  | 2.7  | 69   | 98  | 4 <a href="#">PDB</a>  | MOLECULE: HYPOTHETICAL PROTEIN MG376 HOMOLOG;        |
| <input type="checkbox"/> | 5:    | <a href="#">2hq1-D</a> | 4.3  | 2.3  | 69   | 104 | 4 <a href="#">PDB</a>  | MOLECULE: HYPOTHETICAL PROTEIN MG376 HOMOLOG;        |
| <input type="checkbox"/> | 6:    | <a href="#">2hq1-C</a> | 4.3  | 2.5  | 65   | 91  | 5 <a href="#">PDB</a>  | MOLECULE: HYPOTHETICAL PROTEIN MG376 HOMOLOG;        |
| <input type="checkbox"/> | 7:    | <a href="#">3pgz-A</a> | 4.3  | 3.1  | 73   | 109 | 7 <a href="#">PDB</a>  | MOLECULE: SINGLE-STRANDED DNA-BINDING PROTEIN;       |
| <input type="checkbox"/> | 8:    | <a href="#">2dud-B</a> | 4.3  | 2.8  | 69   | 92  | 10 <a href="#">PDB</a> | MOLECULE: SINGLE-STRANDED DNA-BINDING PROTEIN;       |
| <input type="checkbox"/> | 9:    | <a href="#">1sru-C</a> | 4.3  | 3.0  | 71   | 96  | 10 <a href="#">PDB</a> | MOLECULE: SINGLE-STRAND BINDING PROTEIN;             |
| <input type="checkbox"/> | 10:   | <a href="#">3koj-B</a> | 4.2  | 3.2  | 69   | 90  | 6 <a href="#">PDB</a>  | MOLECULE: UNCHARACTERIZED PROTEIN YCF41;             |
| <input type="checkbox"/> | 11:   | <a href="#">2hq1-A</a> | 4.2  | 2.3  | 69   | 104 | 7 <a href="#">PDB</a>  | MOLECULE: HYPOTHETICAL PROTEIN MG376 HOMOLOG;        |
| <input type="checkbox"/> | 12:   | <a href="#">3dm4-A</a> | 4.2  | 3.1  | 69   | 98  | 7 <a href="#">PDB</a>  | MOLECULE: PRIMOSOMAL REPLICATION PROTEIN N;          |
| <input type="checkbox"/> | 13:   | <a href="#">2dud-A</a> | 4.2  | 2.9  | 72   | 95  | 10 <a href="#">PDB</a> | MOLECULE: SINGLE-STRANDED DNA-BINDING PROTEIN;       |
| <input type="checkbox"/> | 14:   | <a href="#">3k8a-B</a> | 4.1  | 3.1  | 70   | 103 | 14 <a href="#">PDB</a> | MOLECULE: PUTATIVE PRIMOSOMAL REPLICATION PROTEIN;   |
| <input type="checkbox"/> | 15:   | <a href="#">3k8a-A</a> | 4.1  | 3.2  | 70   | 100 | 14 <a href="#">PDB</a> | MOLECULE: PUTATIVE PRIMOSOMAL REPLICATION PROTEIN;   |
| <input type="checkbox"/> | 16:   | <a href="#">3fhw-A</a> | 4.1  | 3.2  | 69   | 100 | 7 <a href="#">PDB</a>  | MOLECULE: PRIMOSOMAL REPLICATION PROTEIN N;          |
| <input type="checkbox"/> | 17:   | <a href="#">3k81-D</a> | 4.1  | 3.1  | 72   | 106 | 13 <a href="#">PDB</a> | MOLECULE: MP18 RNA EDITING COMPLEX PROTEIN;          |
| <input type="checkbox"/> | 18:   | <a href="#">3klw-A</a> | 4.1  | 3.1  | 69   | 98  | 7 <a href="#">PDB</a>  | MOLECULE: PRIMOSOMAL REPLICATION PROTEIN N;          |
| <input type="checkbox"/> | 19:   | <a href="#">3fhw-B</a> | 4.1  | 3.2  | 69   | 100 | 7 <a href="#">PDB</a>  | MOLECULE: PRIMOSOMAL REPLICATION PROTEIN N;          |
| <input type="checkbox"/> | 20:   | <a href="#">1s3o-B</a> | 4.1  | 3.1  | 72   | 104 | 10 <a href="#">PDB</a> | MOLECULE: SINGLE-STRANDED DNA-BINDING PROTEIN,       |
| <input type="checkbox"/> | 21:   | <a href="#">3lgi-A</a> | 4.1  | 2.7  | 66   | 95  | 9 <a href="#">PDB</a>  | MOLECULE: SINGLE-STRANDED DNA-BINDING PROTEIN;       |
| <input type="checkbox"/> | 22:   | <a href="#">3pgz-B</a> | 4.0  | 2.8  | 69   | 114 | 7 <a href="#">PDB</a>  | MOLECULE: SINGLE-STRANDED DNA-BINDING PROTEIN;       |
| <input type="checkbox"/> | 23:   | <a href="#">2vw9-B</a> | 4.0  | 3.0  | 69   | 105 | 13 <a href="#">PDB</a> | MOLECULE: SINGLE-STRANDED DNA BINDING PROTEIN;       |
| <input type="checkbox"/> | 24:   | <a href="#">1woc-A</a> | 4.0  | 3.7  | 71   | 99  | 7 <a href="#">PDB</a>  | MOLECULE: PRIMOSOMAL REPLICATION PROTEIN N;          |
| <input type="checkbox"/> | 25:   | <a href="#">1woc-D</a> | 4.0  | 3.3  | 71   | 99  | 6 <a href="#">PDB</a>  | MOLECULE: PRIMOSOMAL REPLICATION PROTEIN N;          |
| <input type="checkbox"/> | 26:   | <a href="#">1woc-B</a> | 4.0  | 3.8  | 71   | 99  | 7 <a href="#">PDB</a>  | MOLECULE: PRIMOSOMAL REPLICATION PROTEIN N;          |
| <input type="checkbox"/> | 27:   | <a href="#">1s3o-A</a> | 4.0  | 2.9  | 71   | 107 | 10 <a href="#">PDB</a> | MOLECULE: SINGLE-STRANDED DNA-BINDING PROTEIN,       |
| <input type="checkbox"/> | 28:   | <a href="#">2ccz-B</a> | 4.0  | 3.5  | 74   | 118 | 5 <a href="#">PDB</a>  | MOLECULE: 5'-D(*TP*TP*TP*TP*TP*TP*TP*TP*TP           |
| <input type="checkbox"/> | 29:   | <a href="#">3ull-B</a> | 4.0  | 3.1  | 72   | 103 | 8 <a href="#">PDB</a>  | MOLECULE: DNA BINDING PROTEIN;                       |
| <input type="checkbox"/> | 30:   | <a href="#">1wyd-A</a> | 4.0  | 3.0  | 68   | 428 | 1 <a href="#">PDB</a>  | MOLECULE: HYPOTHETICAL ASPARTYL-TRNA SYNTHETASE;     |
| <input type="checkbox"/> | 31:   | <a href="#">2vl6-C</a> | 4.0  | 2.8  | 70   | 259 | 10 <a href="#">PDB</a> | MOLECULE: MINICHROMOSOME MAINTENANCE PROTEIN MCM;    |
| <input type="checkbox"/> | 32:   | <a href="#">3vdy-B</a> | 4.0  | 3.2  | 69   | 97  | 13 <a href="#">PDB</a> | MOLECULE: SINGLE-STRANDED DNA-BINDING PROTEIN SSB;   |
| <input type="checkbox"/> | 33:   | <a href="#">3koj-A</a> | 4.0  | 3.4  | 68   | 89  | 6 <a href="#">PDB</a>  | MOLECULE: UNCHARACTERIZED PROTEIN YCF41;             |
| <input type="checkbox"/> | 34:   | <a href="#">3jc7-5</a> | 4.0  | 2.7  | 71   | 654 | 4 <a href="#">PDB</a>  | MOLECULE: DNA REPLICATION LICENSING FACTOR MCM2;     |
| <input type="checkbox"/> | 35:   | <a href="#">1sru-B</a> | 4.0  | 3.3  | 70   | 97  | 11 <a href="#">PDB</a> | MOLECULE: SINGLE-STRAND BINDING PROTEIN;             |
| <input type="checkbox"/> | 36:   | <a href="#">3nel-A</a> | 3.9  | 3.0  | 68   | 439 | 3 <a href="#">PDB</a>  | MOLECULE: ASPARTYL-TRNA SYNTHETASE;                  |
| <input type="checkbox"/> | 37:   | <a href="#">4fdb-A</a> | 3.9  | 3.2  | 67   | 95  | 12 <a href="#">PDB</a> | MOLECULE: PROBABLE PRIMOSOMAL REPLICATION PROTEIN N; |
| <input type="checkbox"/> | 38:   | <a href="#">3ulp-C</a> | 3.9  | 3.1  | 73   | 116 | 8 <a href="#">PDB</a>  | MOLECULE: SINGLE-STRAND BINDING PROTEIN;             |
| <input type="checkbox"/> | 39:   | <a href="#">3ulp-A</a> | 3.9  | 3.1  | 73   | 114 | 8 <a href="#">PDB</a>  | MOLECULE: SINGLE-STRAND BINDING PROTEIN;             |
| <input type="checkbox"/> | 40:   | <a href="#">3ulp-D</a> | 3.9  | 3.1  | 73   | 113 | 8 <a href="#">PDB</a>  | MOLECULE: SINGLE-STRAND BINDING PROTEIN;             |
| <input type="checkbox"/> | 41:   | <a href="#">3k80-C</a> | 3.9  | 2.9  | 71   | 103 | 13 <a href="#">PDB</a> | MOLECULE: ANTIBODY;                                  |
| <input type="checkbox"/> | 42:   | <a href="#">3nem-A</a> | 3.9  | 3.0  | 68   | 439 | 3 <a href="#">PDB</a>  | MOLECULE: ASPARTYL-TRNA SYNTHETASE;                  |
| <input type="checkbox"/> | 43:   | <a href="#">3ulp-B</a> | 3.9  | 3.1  | 73   | 114 | 8 <a href="#">PDB</a>  | MOLECULE: SINGLE-STRAND BINDING PROTEIN;             |
| <input type="checkbox"/> | 44:   | <a href="#">3stb-C</a> | 3.9  | 3.0  | 71   | 111 | 10 <a href="#">PDB</a> | MOLECULE: SINGLE DOMAIN ANTIBODY VHH;                |
| <input type="checkbox"/> | 45:   | <a href="#">3jc6-5</a> | 3.9  | 3.0  | 70   | 254 | 3 <a href="#">PDB</a>  | MOLECULE: DNA REPLICATION LICENSING FACTOR MCM2;     |
| <input type="checkbox"/> | 46:   | <a href="#">1wyd-B</a> | 3.9  | 3.0  | 68   | 429 | 1 <a href="#">PDB</a>  | MOLECULE: HYPOTHETICAL ASPARTYL-TRNA SYNTHETASE;     |
| <input type="checkbox"/> | 47:   | <a href="#">1v1q-B</a> | 3.9  | 3.3  | 74   | 112 | 5 <a href="#">PDB</a>  | MOLECULE: PRIMOSOMAL REPLICATION PROTEIN N;          |
| <input type="checkbox"/> | 48:   | <a href="#">2vl6-A</a> | 3.9  | 2.8  | 70   | 259 | 10 <a href="#">PDB</a> | MOLECULE: MINICHROMOSOME MAINTENANCE PROTEIN MCM;    |
| <input type="checkbox"/> | 49:   | <a href="#">3ull-A</a> | 3.9  | 2.9  | 71   | 106 | 10 <a href="#">PDB</a> | MOLECULE: DNA BINDING PROTEIN;                       |
| <input type="checkbox"/> | 50:   | <a href="#">2vl6-B</a> | 3.9  | 2.8  | 70   | 259 | 10 <a href="#">PDB</a> | MOLECULE: MINICHROMOSOME MAINTENANCE PROTEIN MCM;    |

**Fig.3 Phobius transmembrane helix prediction for *B. subtilis* ComEC**

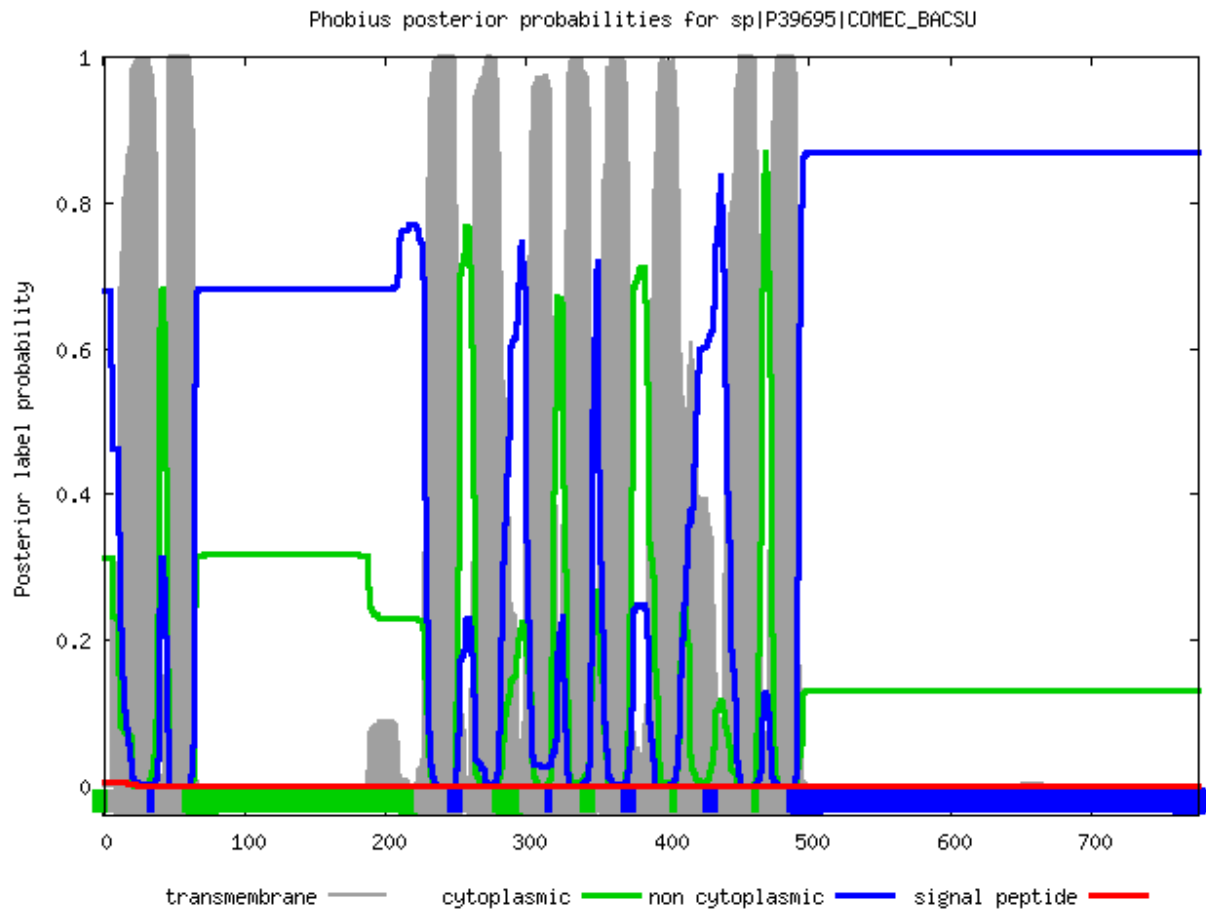

**Supplementary Table 1:** Numbers of sequences in alignments used by the metapredictor PconsC2 to predict contacts for DUF4131 region of *B. subtilis* ComEC. Figures exclude the query sequence.

| E-value | Number of sequences in alignment (HHblits) | Number of sequences in alignment (Jackhmmer) |
|---------|--------------------------------------------|----------------------------------------------|
| 1       | 4478                                       | 11621                                        |
| 1e-4    | 2180                                       | 11039                                        |
| 1e-10   | 1262                                       | 3028                                         |
| 1e-40   | 0                                          | 93                                           |
